# Supplementary material for: TNF superfamily receptor OX40 triggers invariant NKT cell pyroptosis and liver injury
Source: JCI journal article supplement (doi:10.1172/jci91075), 2017-04-23
Supplement: sd1 [file 1]

## Supplemental Figure 1

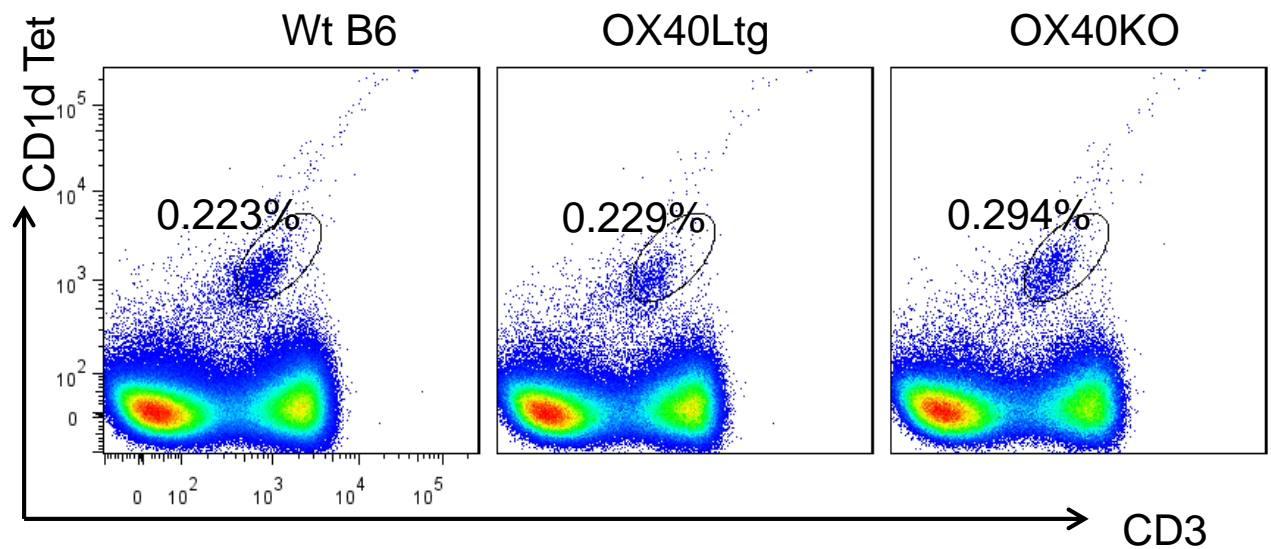

### Supplemental Figure 1. Thymic iNKT cells are comparable among Wt B6, OX40Ltg, and OX40<sup>-/-</sup> mice.

The thymus was harvested from 3 week old mice, and single cell preparation was prepared. Cell were stained with CD1d-tetramer and anti-CD3, and presence of iNKT cells was analyzed by flow cytometry. The percentage of iNKT cells among total thymocytes was shown. The plot is a representative data of one of three individual experiments.
